# Supplementary material
Source: HighWire-hosted journal article supplement (https://jnm.snmjournals.org/highwire/filestream/93858/field_highwire_adjunct_files/0/jnm088583_supplemental_data.pdf)
Supplement: jnm088583_supplemental_data.pdf [file jnm088583_supplemental_data.pdf]

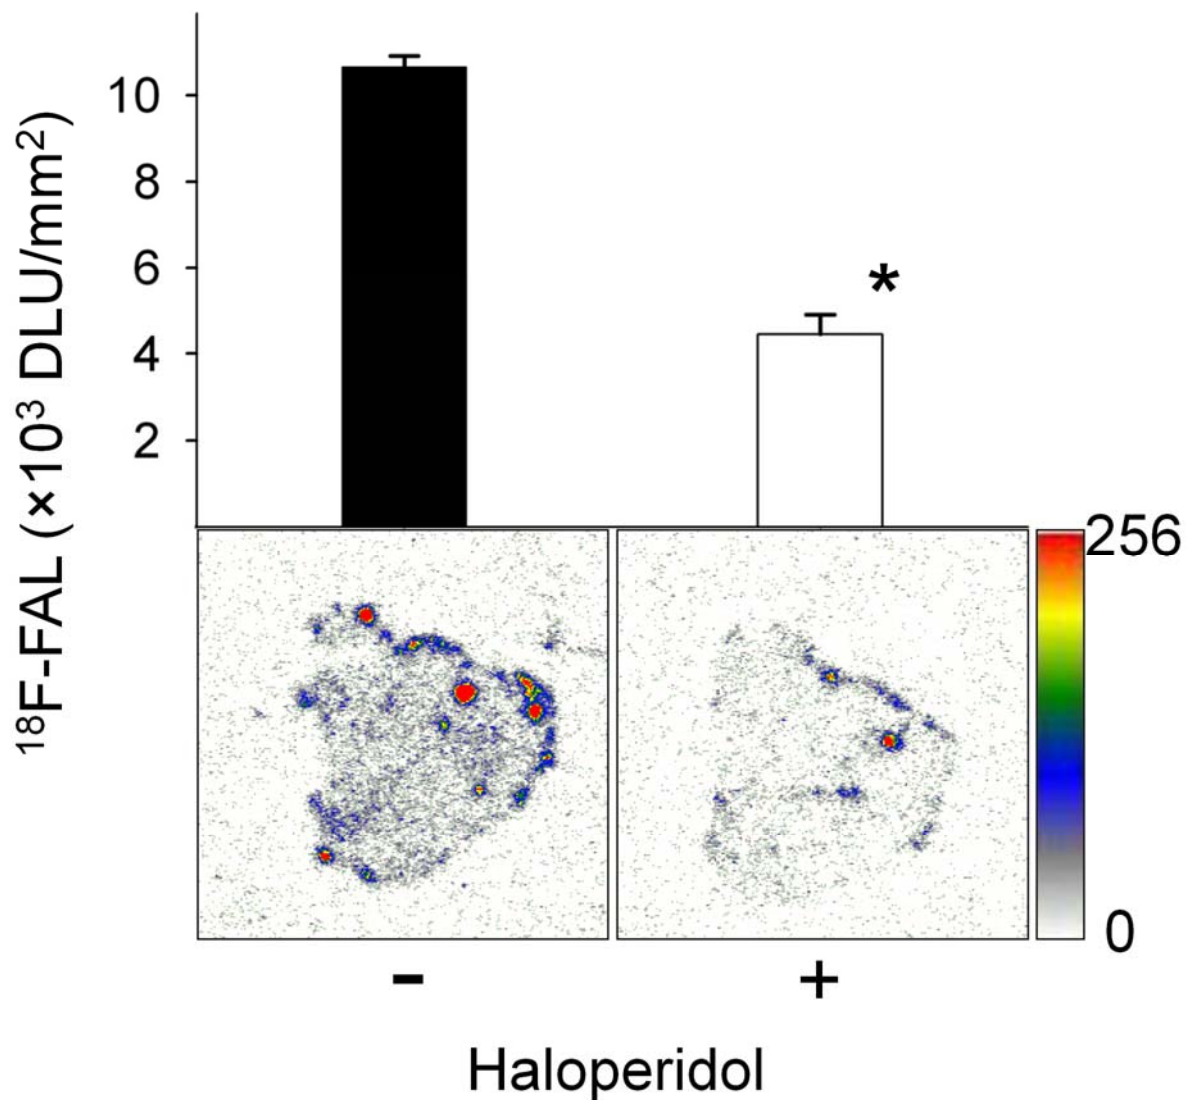

**Figure 1.** Pancreas sections, 10 $\mu\text{m}$ -thick, from Sprague-Dawley rats were incubated with 0.185 MBq/mL  $^{18}\text{F}$ -fallypride in incubation buffer (50 mM Tris HCl buffer, pH 7.4, containing 120 mM NaCl, 5 mM KCl, 2 mM  $\text{CaCl}_2$ , 1 mM  $\text{MgCl}_2$ , 1 mM NaEDTA, and 0.1 mM sodium ascorbate, pH 7.4) in the absence or presence of 100 $\mu\text{M}$  haloperidol for 1 hour in a 37°C. Sections were washed twice with equal volumes of cold incubation buffer, after which the slides were quickly air-dried then exposed to phosphor screens over night and activity detected by autoradiography. The total  $^{18}\text{F}$ -fallypride binding in sections measured in digital light units per  $\text{mm}^2$  (DLU/ $\text{mm}^2$ ) (n=4) is shown. \* p<0.05

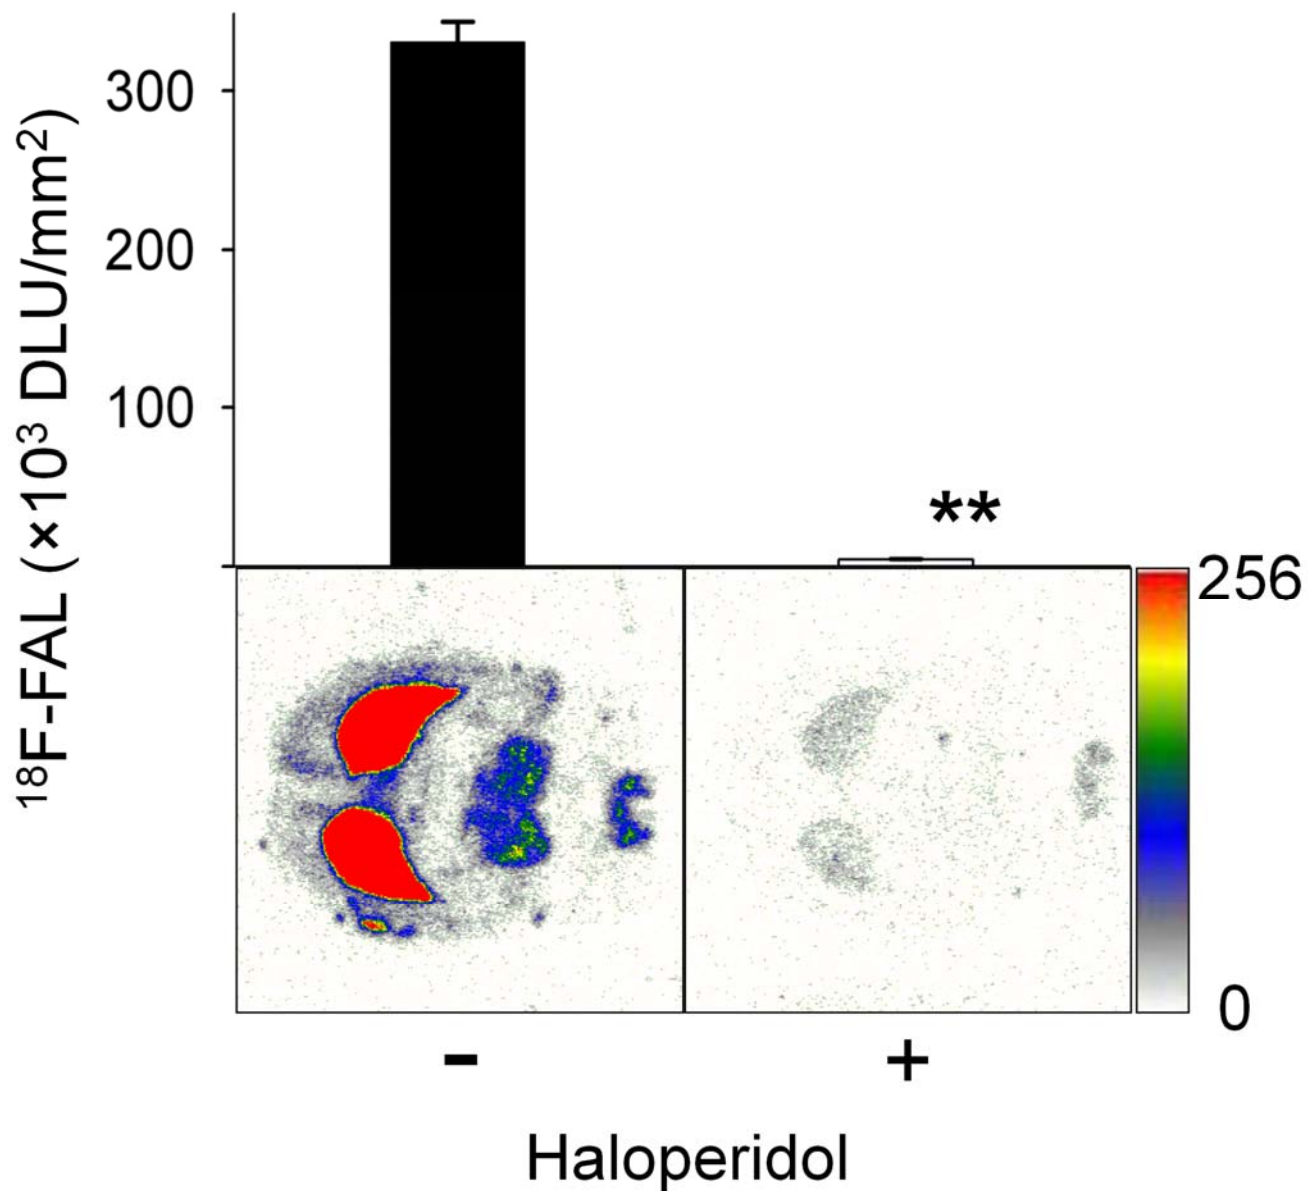

**Figure 2.** Autoradiographic images of fresh-frozen rat brain sections (10  $\mu\text{m}$ ) incubated with 0.185 MBq/mL  $^{18}\text{F}$ -fallypride in the presence or absence of 100  $\mu\text{M}$  haloperidol. The total  $^{18}\text{F}$ -fallypride binding activity over striatum was measured in digital light units per  $\text{mm}^2$  ( $\text{DLU/mm}^2$ ) ( $n=4$ ) is shown.

\*\*  $p < 0.001$

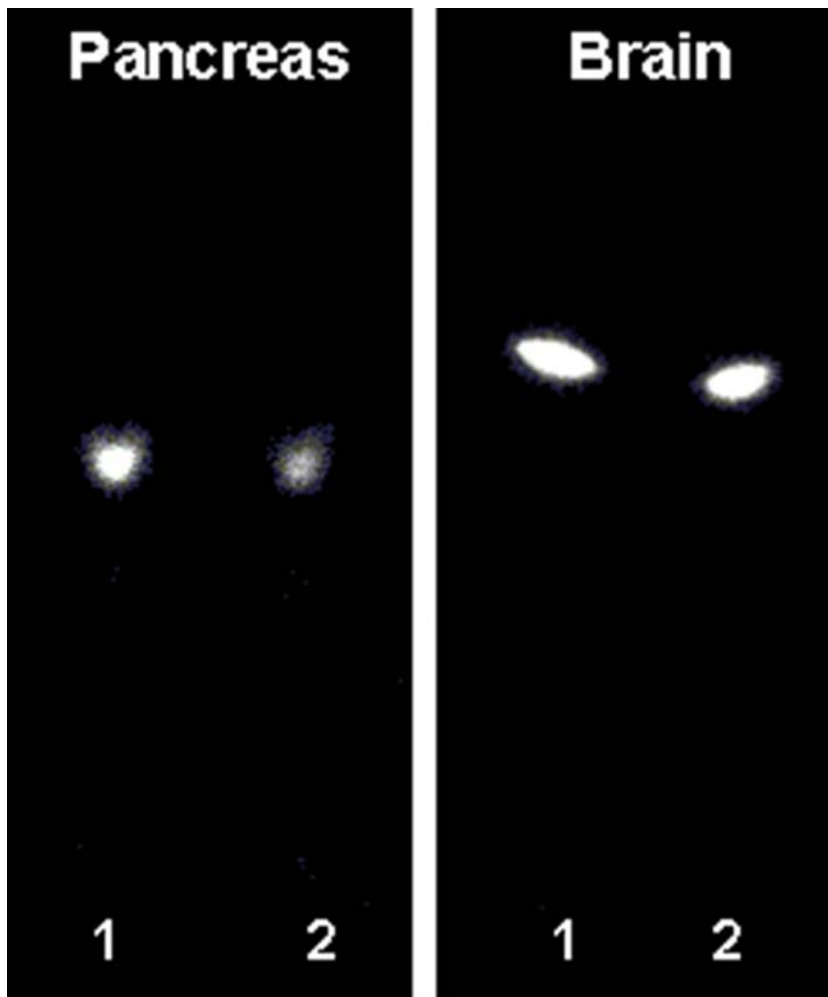

**Figure 3.** Autoradiographic images of thin-layer chromatography of ethyl acetate extracts of rat pancreatic and brain tissues 3 hrs post  $^{18}\text{F}$ -fallypride injection (28-37 MBq). Organs were procured after cardiac perfusion with 10 mL phosphate buffered saline. For characterization of  $^{18}\text{F}$ -fallypride in tissues, brain and pancreas were taken separately and homogenized in 2 mL of 1.15% KCl buffer by a Tekmar tissue homogenizer at half maximal speed. To each homogenate, 2 mL of a methanol solution containing 2% acetic acid was added and solutions were vortexed. Aliquots of 1.5 mL from each tube were removed and reference  $^{18}\text{F}$ -fallypride was added ( $\sim 1\text{-}4$  kBq). Solutions were then vortexed. Tissue homogenate aliquots with and without reference  $^{18}\text{F}$ -fallypride were centrifuged at  $10,000\times g$  for 10 min. Supernatants were removed, concentrated, and spotted on silica thin layer chromatographic (TLC) plates (Silica Gel IB2-F,  $2.5\times 7.5$  cm; J.T. Baker) and eluted with (9:1) dichloromethane:methanol. Plates were then exposed to phosphor screens and autoradiograms

show: *lane 1*, Reference  $^{18}\text{F}$ -fallypride was added to tissue extracts; *lane 2*, Extracted  $^{18}\text{F}$ -fallypride in the same tissue from rats administered  $^{18}\text{F}$ -fallypride.

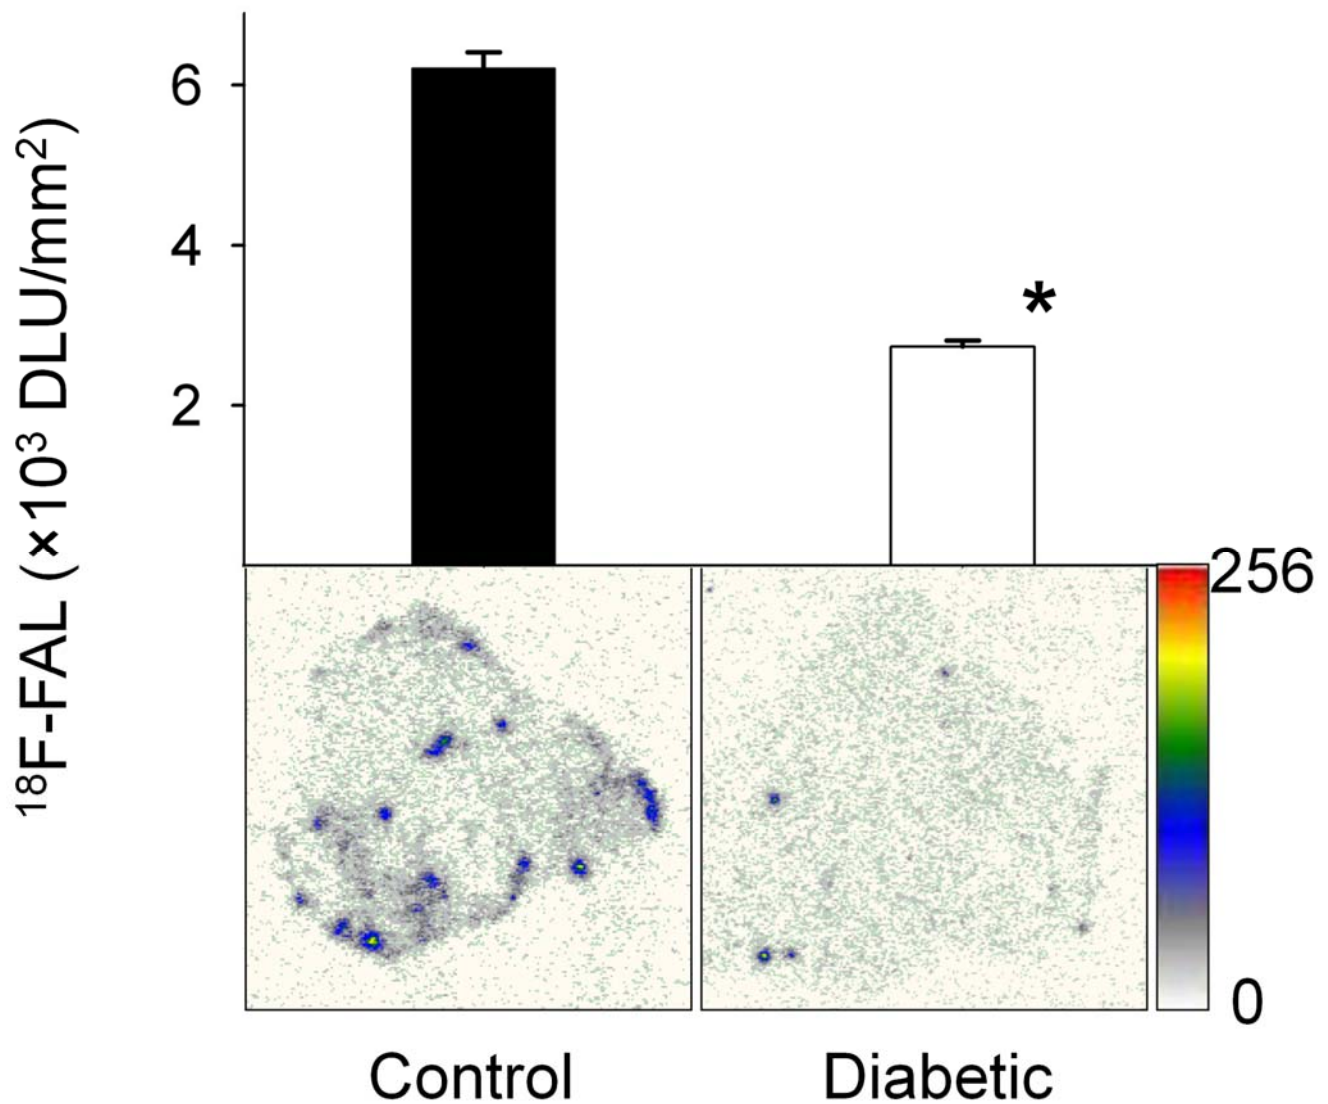

**Figure 4.** Autoradiographic images of fresh-frozen rat pancreatic sections (10  $\mu\text{m}$ ) from control and diabetic rats incubated with 0.185 MBq  $^{18}\text{F}$ -fallypride ( $n=4$  in each case) and activity over the sections were measured in digital light units per  $\text{mm}^2$  (DLU/ $\text{mm}^2$ ). Chemical destruction of islets decreases  $^{18}\text{F}$ -fallypride binding to pancreas. \*  $p<0.01$

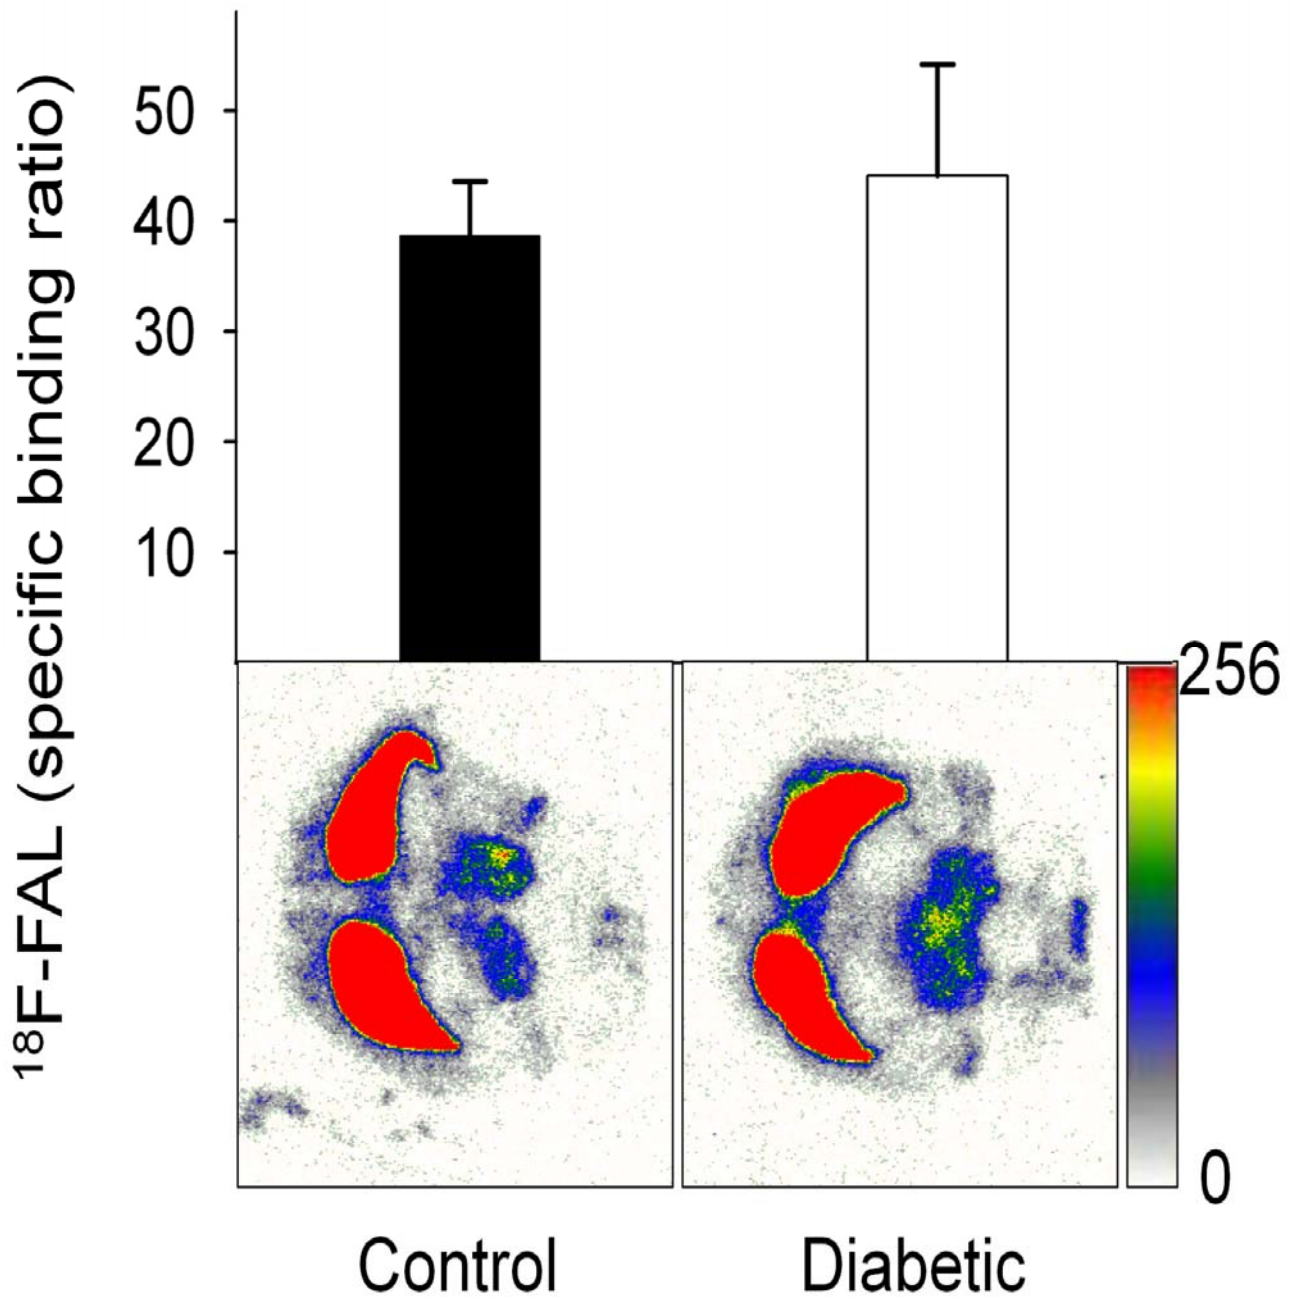

**Figure 5.** Autoradiographic images of fresh-frozen horizontal brain sections of control and diabetic rats. Specific binding ratio (striatum activity-cerebellum activity) / cerebellum activity) was computed for  $^{18}\text{F}$ -fallypride (n=4). Black and white bars indicate  $^{18}\text{F}$ -fallypride binding ratio in control and diabetic animals.



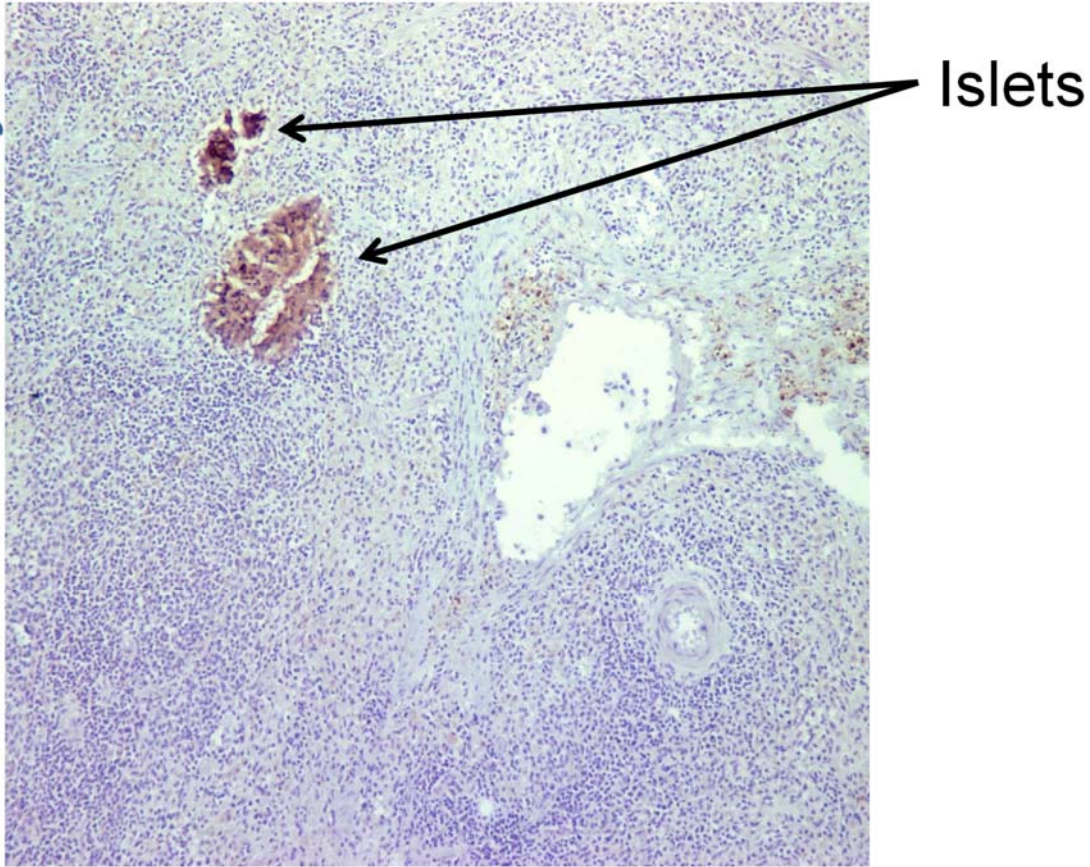

**Figure 6.** Immunostaining and hematoxylin staining: Frozen pancreas and spleen sections, 10 $\mu$ m thick were fixed in 4% paraformaldehyde in PBS for 10 min and endogenous peroxidase quenched in 1.5% hydrogen peroxide for 15 min. Insulin staining was accomplished using 1:50 of an HRP conjugated insulin affibody (Abcam cat. #: ab31907) for 45 min at room temperature. The HRP signal was detected with DAB Peroxidase Substrate Kit (Vector Labs, cat # sk-4100). Tissues were then counter stained with Gill's hematoxylin 2x per (as per manufacturers instructions) for 5 min, differentiated with 1-2 dips in acid alcohol (1% HCl in 70% EtOH), blued in 0.1% sodium bicarbonate solution and dehydrated to 100% ethanol. Slides were then mounted with permount and glass coverslips. Figure shows Insulin staining of spleen sections after completion of imaging study showing presence of grafted islets.

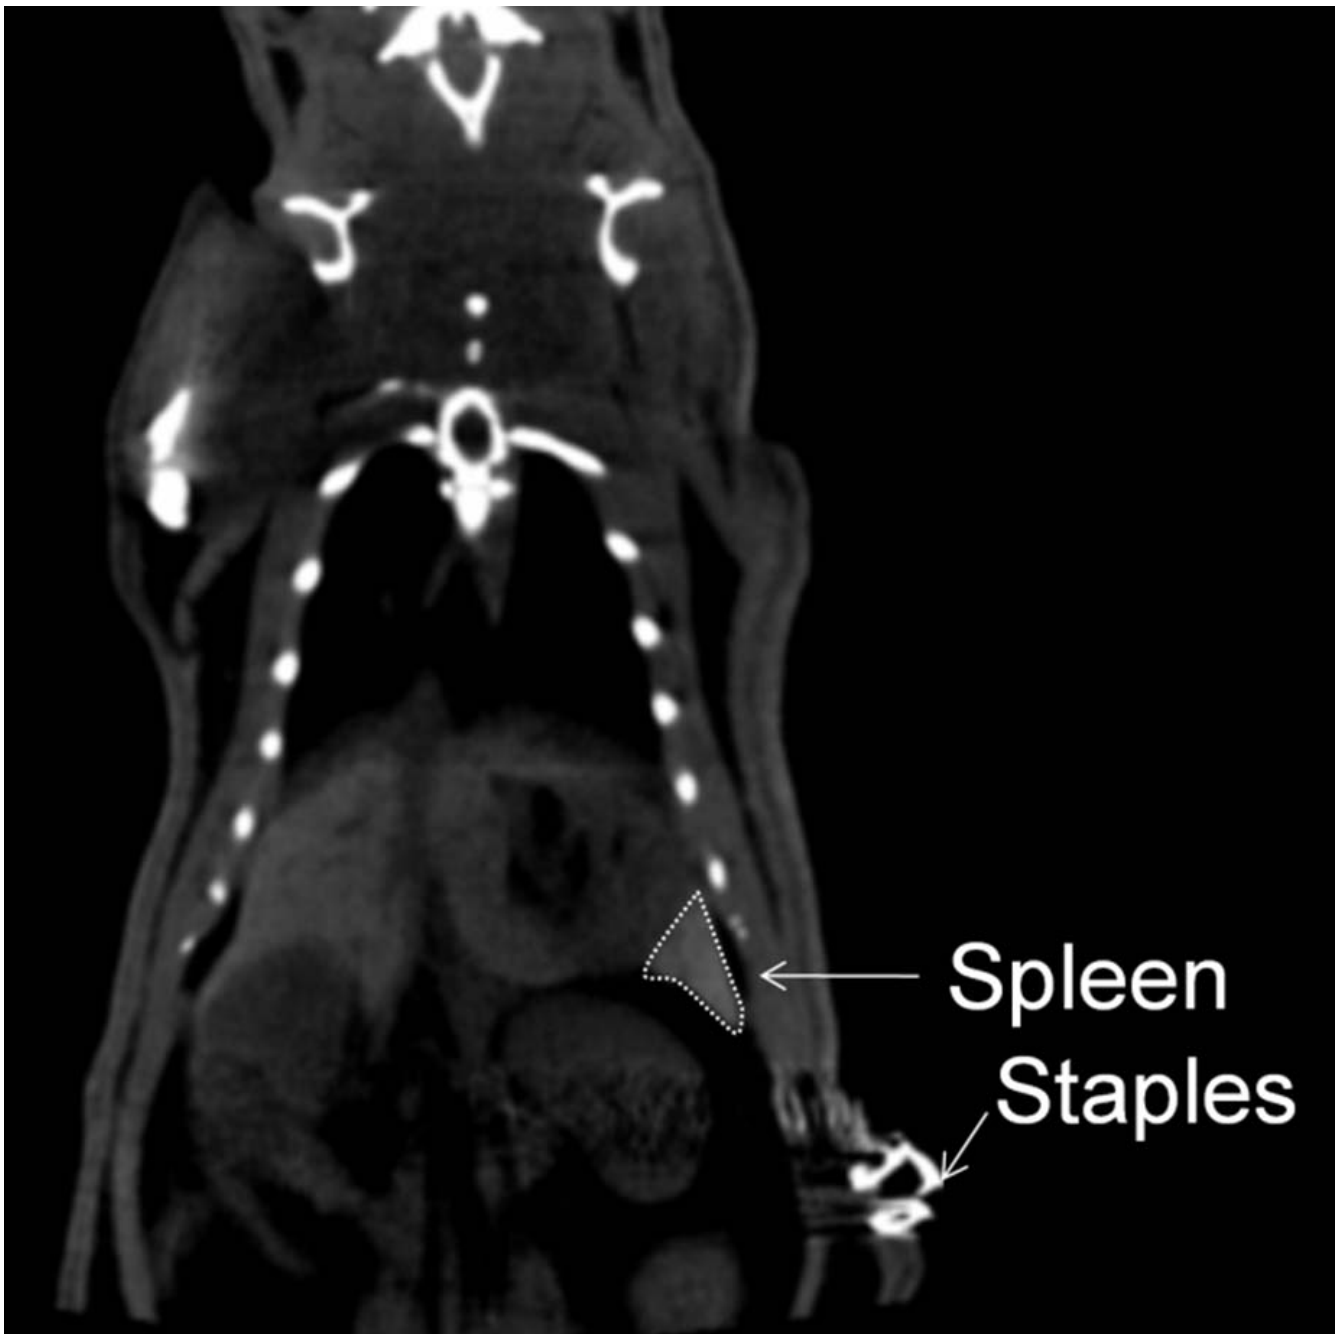

**Figure 7.** Contrast MicroCT imaging of the spleen in the islet-transplanted animal. EXIA 160-XL was injected i.v. 30 min prior to microCT imaging of abdomen. A 10 min scan revealed accumulation of contrast in the spleen and was detectable among other abdominal organs in all projections.
